## Corrections

Propionyl-CoA inhibition of citrate synthase and methyl citrate production studied by  $^1\text{H}$  nuclear-magnetic-resonance spectroscopy

By S. E. C. DAVIES, T. FRENKJEL, R. A. CHALMERS and R. A. ILES

Volume 15 No. 1 (1987)

p. 151, left-hand column, lines 26–28 should read: ...synthase at pH 7.0 and 37°C was **60  $\mu\text{mol/min per mg of protein}$** . In the presence of 1.3 mM-propionyl-CoA it fell to **37  $\mu\text{mol/min per mg of protein}$** .

Localization and characterization of glutaminase activity in the murine macrophage

By PHILIP NEWSHOLME, RUI CURI, EVA BLOMSTRAND, SIAMON GORDON and ERIC A. NEWSHOLME

Volume 15 No. 3 (1987)

p. 536, right-hand column, line 9 should read: ...in a crude extract of macrophage was **4.8 mM**.

The respiratory chain of anaerobically grown *Escherichia coli*: reactions with nitrate and oxygen

By RICHARD A. ROTHERY, ALEXANDER M. HOUSTON and W. JOHN INGLEDEW

Volume 15 No. 5 (1987)

The title of this paper should read: The respiratory chain of anaerobically grown *Escherichia coli*: reactions with **nitrite** and oxygen.

Glucose homoeostasis after injury in man

Volume 15 No. 6 (1987)

By K. N. FRAYN

The author's address should read: **The Sheikh Rashid Diabetes Unit, The Radcliffe Infirmary, Oxford OX2 6HE.**
